# Supplementary material for: Kaempferol Improves Cardiolipin and ATP in Hepatic Cells: A Cellular Model Perspective in the Context of Metabolic Dysfunction-Associated Steatotic Liver Disease
Source: MDPI journal article supplement (doi:10.3390/nu16040508), 2024-02-11
Supplement: s1 [file s1]

## Supplementary data

Table S1. Experimental design in cell viability, mitochondrial function, and real-time PCR.

| Group   | Cell viability |                      | Mitochondrial function |                      | real-time PCR |                      |
|---------|----------------|----------------------|------------------------|----------------------|---------------|----------------------|
|         | KMP (μM)       | Incubation time (hr) | KMP (μM)               | Incubation time (hr) | KMP (μM)      | Incubation time (hr) |
| Control | 0              | 24                   | 0                      | 24                   | 0             | 6                    |
| KMP     | 0.001 – 100    | 24                   | 10                     | 24                   | 1, 10         | 6                    |

Table S2. Experimental design in lipidomic analysis.

| CL and MLCL |         |          |                      |
|-------------|---------|----------|----------------------|
| Group       | LA (mM) | KMP (μM) | Incubation time (hr) |
| Control     | 0       | 0        | 24                   |
| LA          | 0.8     | 0        | 24                   |
| LA + KMP1   | 0.8     | 1        | 24                   |
| LA + KMP10  | 0.8     | 10       | 24                   |

Table S3. Primer sets used in this study.

| Gene                            | Forward primer (5'-3')    | Reverse primer (5'-3')    |
|---------------------------------|---------------------------|---------------------------|
| <i>CPT1A</i>                    | CTTTGGCCCTGTAGCAGATGA     | TCGTCTCTGAGCTTGAGAACTT    |
| <i>SIRT3</i>                    | TGGAAAGCCTAGTGGAGCTTCTGGG | TGGGGGCAGCCATCATCCTATTTGT |
| <i>FOXO3A</i>                   | TTCAAGGATAAGGGCGACAGCAAC  | CTGCCAGGCCACTTGGAGAG      |
| <i>PPARGC1A</i>                 | TGAACTGAGGGACAGTGATTTC    | CCCAAGGGTAGCTCAGTTTATC    |
| <i>TFAM</i>                     | ATAGGCACAGGAAACCAGTTAG    | GCAGAAGTCCATGAGCTGAATA    |
| <i>ND1</i>                      | ATGGCCAACCTCCTACTCCT      | GCGGTGATGTAGAGGGTGAT      |
| <i><math>\beta</math>-actin</i> | CCAACCGCGAGAAGATGA        | CCAGAGGCGTACAGGGATAG      |
| <i>GAPDH</i>                    | GAAGGTGAAGGTCGGAGTC       | GAAGATGGTGATGGGATTTC      |

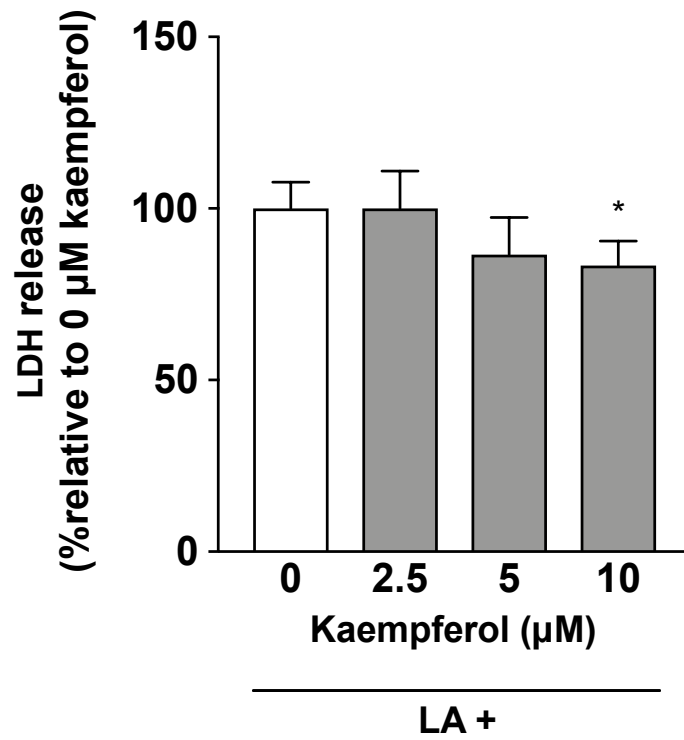

Figure S1. Cytotoxicity test in linoleic acid (LA)-loaded fatty liver cell model supplemented with or without kaempferol (KMP). Lactate dehydrogenase (LDH) in the supernatant following stimulation. \*  $P < 0.05$ , one-way analysis of variance (ANOVA) with Dunnet's multiple comparisons test compared to the 0  $\mu$ M KMP group ( $n = 6$  for each group).
